# Supplementary material for: Functional region prediction with a set of appropriate homologous sequences-an index for sequence selection by integrating structure and sequence information with spatial statistics
Source: PubMed Central journal article supplement (PMC3533907; doi:10.1186/1472-6807-12-11), 2012-05-29

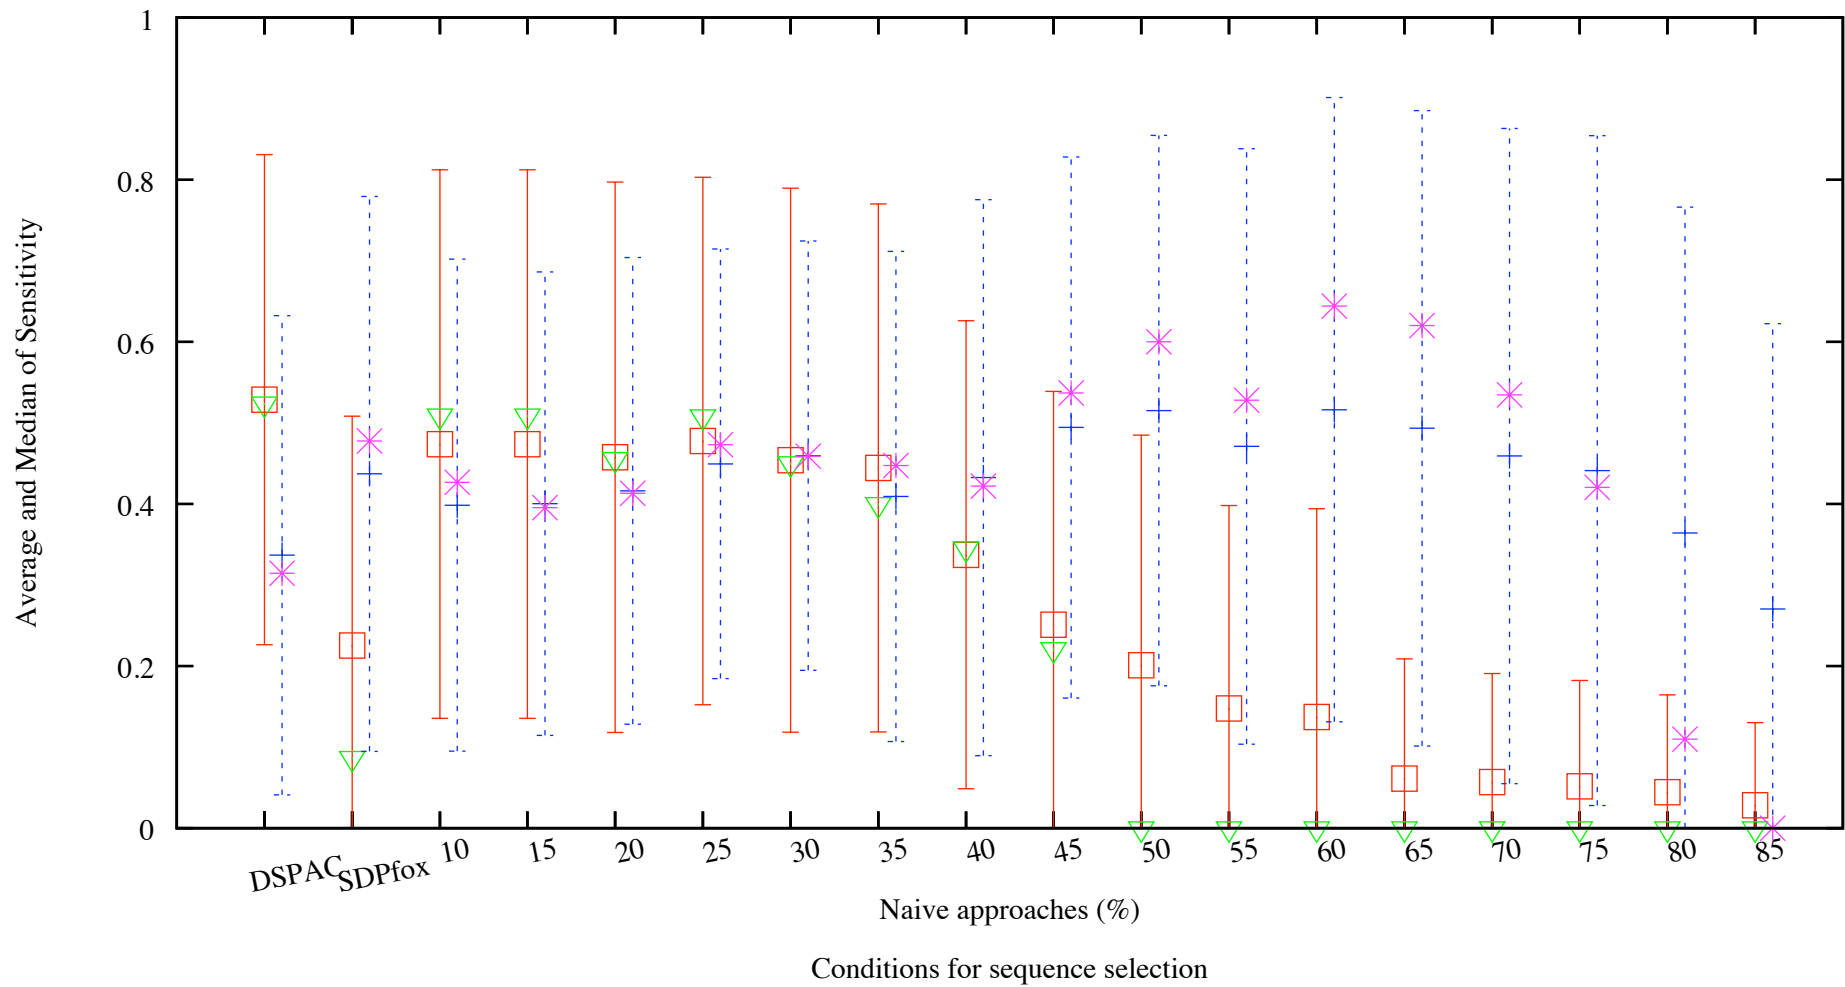

Supplement: 1472-6807-12-11-S1.pdf [file 1472-6807-12-11-S1.pdf]
